# Supplementary material for: Euskal itzultzaile baten bizimodu atsegina
Source: Hindawi journal article supplement (doi:10.1155/2011/609259), 2009-01-01

**(A)**

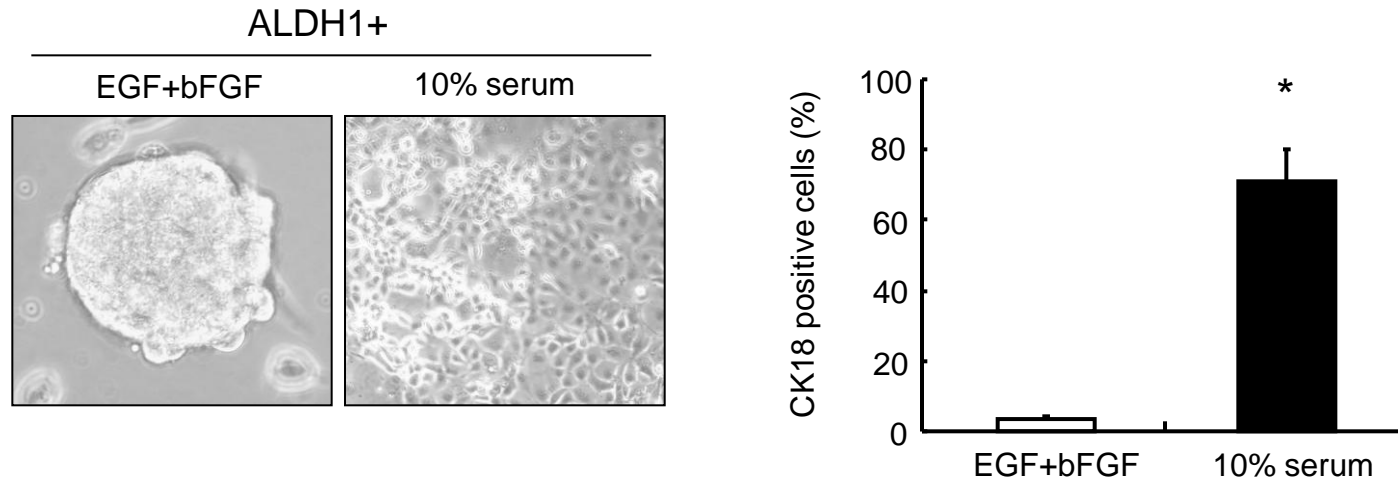

**(B)**

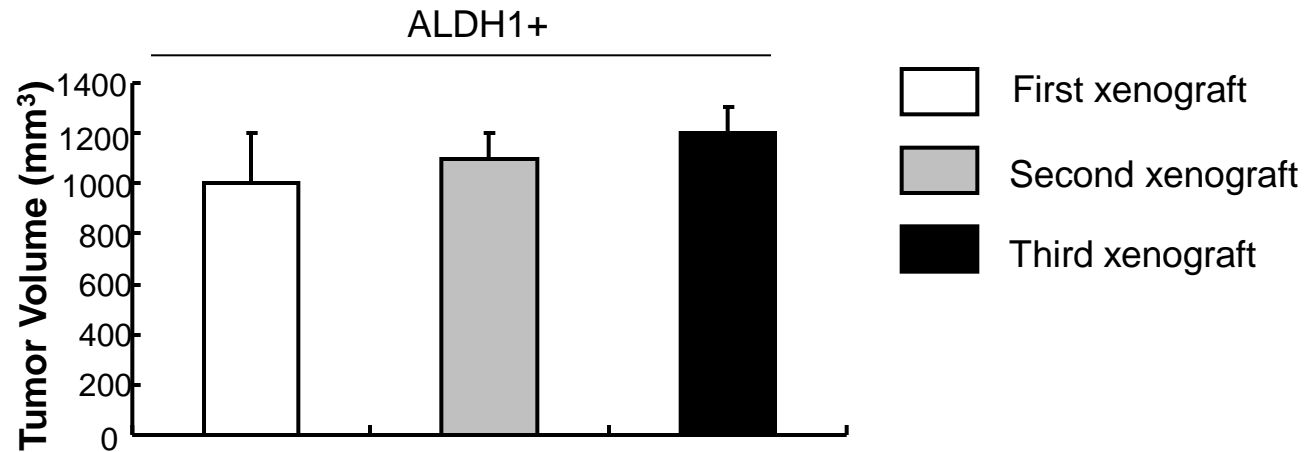

Supplement: f1 [file 609259.f1.pdf]
